# Supplementary material
Source: PubMed Central journal article supplement (PMC3255215)
Supplement: supp_111449_clost-enoch-2-at.pdf [file supp_111449_clost-enoch-2-at.pdf]

**Appendix 2 (as supplied by authors): Antibiotics associated with infection with *Clostridium difficile*<sup>1</sup>**

**Low risk**

Aminoglycosides  
Vancomycin  
Metronidazole  
Rifampicin  
Antipseudomonal penicillins

**Medium risk**

Amoxicillin  
Macrolides  
Tetracyclines  
Fluoroquinolones  
Cotrimoxazole

**High risk**

Clindamycin  
Cephalosporins

**Reference**

1. Bignardi GE. Risk factors for *Clostridium difficile* infection. *J Hosp Infect* 1998;40:1-15.
